# Supplementary material for: Impact of comorbid asthma on severity of coronavirus disease (COVID-19)
Source: PubMed Central journal article supplement (PMC7733453; doi:10.1038/s41598-020-77791-8), 2020-12-11
Supplement: 41598_2020_77791_MOESM1_ESM.pdf [file 41598_2020_77791_MOESM1_ESM.pdf]

**Impact of Comorbid Asthma on Severity of Coronavirus Disease (COVID-19)**

**Author names**

Sang Chul Lee,<sup>1\*</sup> Kang Ju Son,<sup>2,3\*</sup> Chang Hoon Han,<sup>1</sup> Ji Ye Jung,<sup>4†</sup> Seon Cheol Park<sup>1†</sup>

**Affiliations**

<sup>1</sup>*Division of Pulmonology, Department of Internal Medicine, National Health Insurance Service Ilsan Hospital, Goyang-si, Gyeonggi-do, Republic of Korea*

<sup>2</sup>*Department of Research and Analysis, National Health Insurance Service Ilsan Hospital, Goyang-si, Gyeonggi-do, Republic of Korea*

<sup>3</sup>*Department of Biostatistics and Computing, Yonsei University Graduate School, Seoul, Republic of Korea*

<sup>4</sup>*Division of Pulmonary and Critical Care Medicine, Department of Internal Medicine, Severance Hospital, Yonsei University College of Medicine, Seoul, Republic of Korea*

\* These authors contributed equally to this work as first authors.

† These authors contributed equally to this work as corresponding authors.

**Corresponding author**

Ji Ye Jung, MD, PhD

*Division of Pulmonary and Critical Care Medicine, Department of Internal Medicine,*

## Supplementary information

Severance Hospital, Yonsei University College of Medicine, Seoul 03722, Republic of Korea

Telephone number: 82-10-3141-2576; Fax number: 82-2-2228-2273

E-mail: [stopyes@yuhs.ac](mailto:stopyes@yuhs.ac)

Seon Cheol Park, MD, PhD

Division of Pulmonology, Department of Internal Medicine,

National Health Insurance Service Ilsan Hospital, Goyang-si, Gyeonggi-do, Republic of Korea

Telephone number: 82-10-3793-1173; Fax number: 82-31-900-3663

E-mail: [parksc@nhimc.or.kr](mailto:parksc@nhimc.or.kr)

---

## Supplementary information

**Supplementary Table 1.** Determinants of Charlson comorbidity index

| <b>Score</b> | <b>Condition</b>                           |
|--------------|--------------------------------------------|
| 1            | Myocardial infarction                      |
| 1            | Congestive heart failure                   |
| 1            | Peripheral vascular disease                |
| 1            | Cerebrovascular disease                    |
| 1            | Dementia                                   |
| 1            | Chronic pulmonary disease                  |
| 1            | Connective tissue disease                  |
| 1            | Peptic ulcer disease                       |
| 1            | Mild liver disease                         |
| 2            | Hemiplegia                                 |
| 2            | Moderate or severe renal disease           |
| 2            | Diabetes with end-organ damage             |
| 2            | Any malignancy without metastasis          |
| 2            | Leukemia                                   |
| 2            | Lymphoma                                   |
| 3            | Moderate or severe liver disease           |
| 6            | Metastatic solid malignancy                |
| 6            | Acquired immune deficiency syndrome (AIDS) |

Supplementary information

**Supplementary Table 2.** Multivariate analyses of risk factors associated respiratory failure and mortality among total study population (analyzed with using separate comorbidities on behalf of CCI)

| Variable               | Respiratory failure risk |         | Mortality               |         |
|------------------------|--------------------------|---------|-------------------------|---------|
|                        | Adjusted OR<br>(95% CI)  | P-value | Adjusted OR<br>(95% CI) | P-value |
| Model 1                |                          |         |                         |         |
| Age                    | 1.06<br>(1.04-1.07)      | <0.001  | 1.12<br>(1.10-1.13)     | <0.001  |
| Sex, male              | 2.32<br>(1.59-3.39)      | <0.001  | 2.51<br>(1.85-3.42)     | <0.001  |
| Hypertension           | 1.55<br>(0.99-2.43)      | 0.053   | 1.39<br>(0.99-1.96)     | 0.056   |
| Diabetes               | 1.44<br>(0.93-2.24)      | 0.099   | 2.02<br>(1.44-2.84)     | <0.001  |
| Dyslipidemia           | 1.06<br>(0.68-1.66)      | 0.781   | 0.76<br>(0.53-1.08)     | 0.127   |
| IHD                    | 0.88<br>(0.47-1.63)      | 0.694   | 0.90<br>(0.57-1.44)     | 0.686   |
| Heart failure          | 1.50<br>(0.74-3.05)      | 0.256   | 1.98<br>(1.17-3.33)     | 0.010   |
| Malignancies           | 1.18<br>(0.60-2.29)      | 0.621   | 1.01<br>(0.59-1.72)     | 0.965   |
| Asthma                 | 1.04<br>(0.60-1.79)      | 0.877   | 1.28<br>(0.84-1.94)     | 0.240   |
| Model 2*               |                          |         |                         |         |
| Moderate-severe asthma | 0.72<br>(0.13-3.09)      | 0.672   | 2.12<br>(0.97-4.64)     | 0.059   |

\*Adjusted for age, sex (male), hypertension, diabetes, dyslipidemia, IHD, heart failure, and malignancies  
CCI, Charlson comorbidity index; OR, odds ratio; CI, confidence interval; IHD, ischemic heart disease
